# Supplementary material for: AXL Inactivation Inhibits Mesothelioma Growth and Migration via Regulation of p53 Expression
Source: MDPI journal article supplement (doi:10.3390/cancers12102757), 2020-09-25
Supplement: s1 [file s1]

**Figure 2A ( AXL knockdown in MESO924, MESO296, MESO428, and JMN1B. Order: pLKO and AXL shRNA )**

**MESO924**

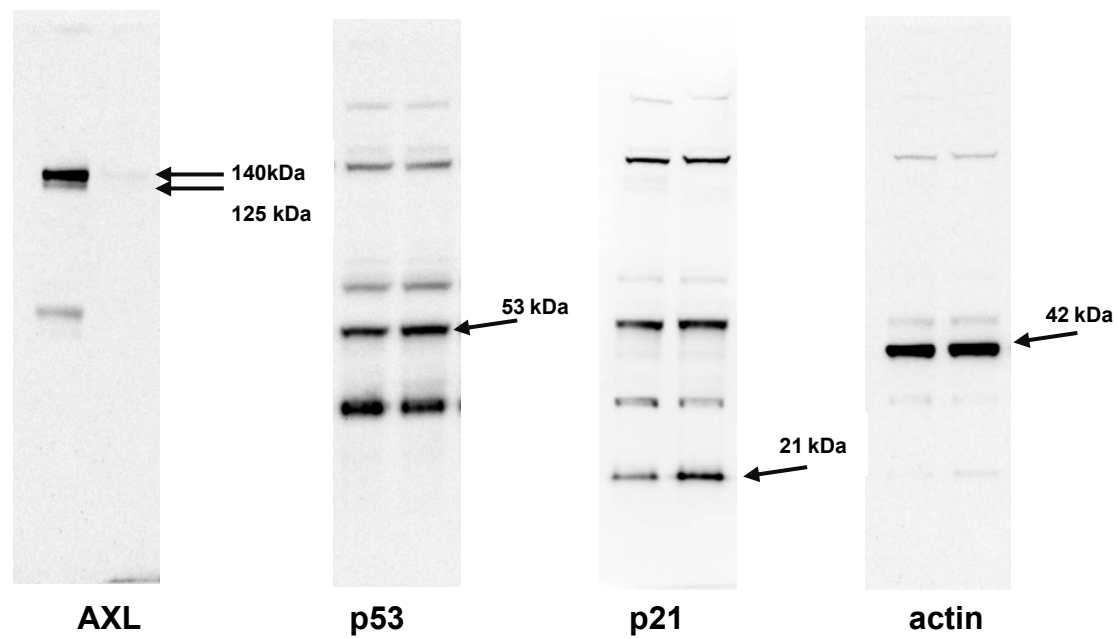

**MESO296**

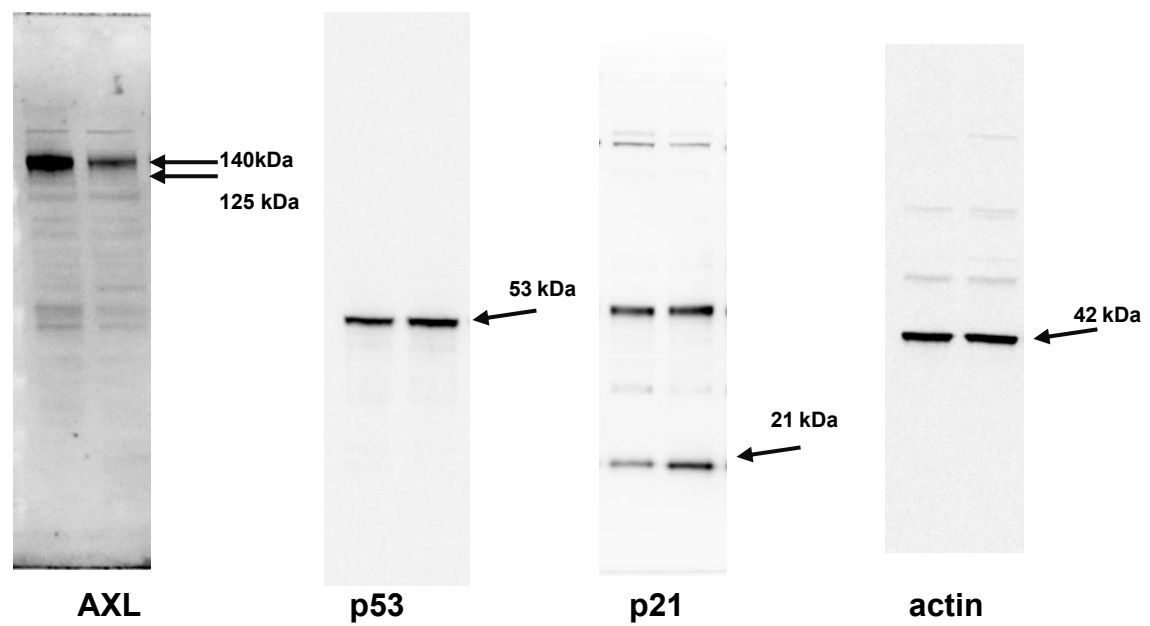

## MESO428

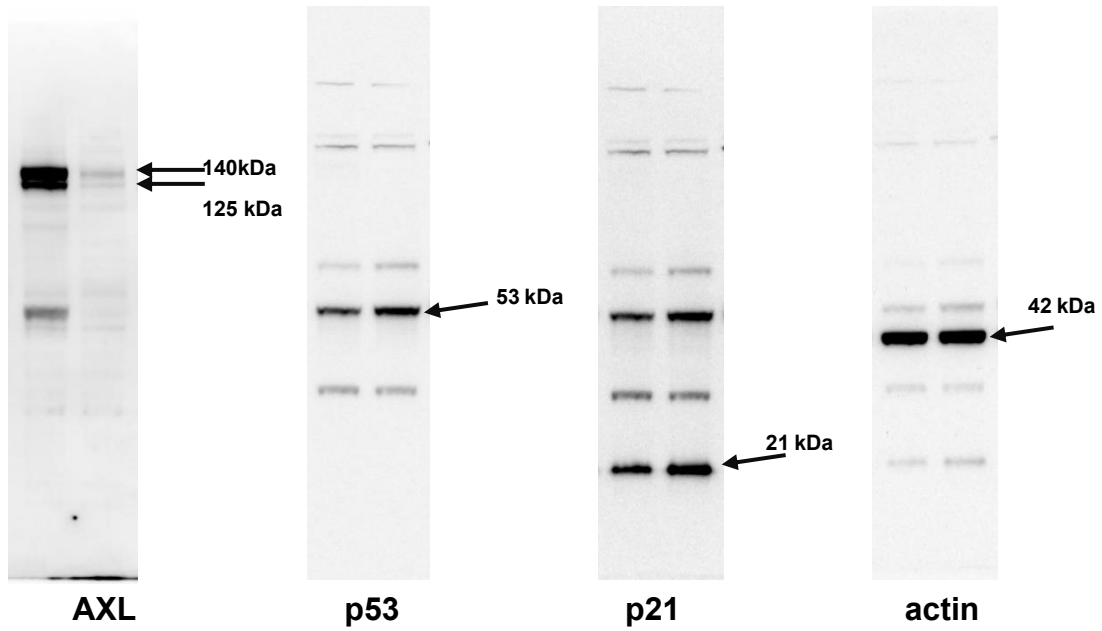

## JMN1B

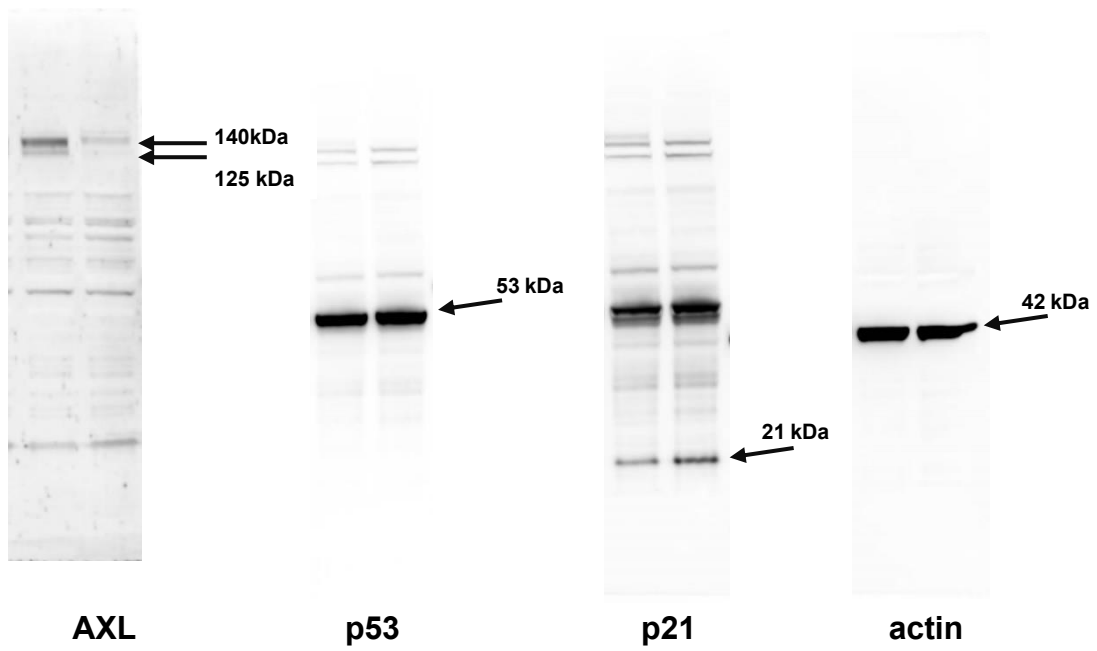

**Figure 2B (Co-transfection of AXL and p53 in COS-7)**

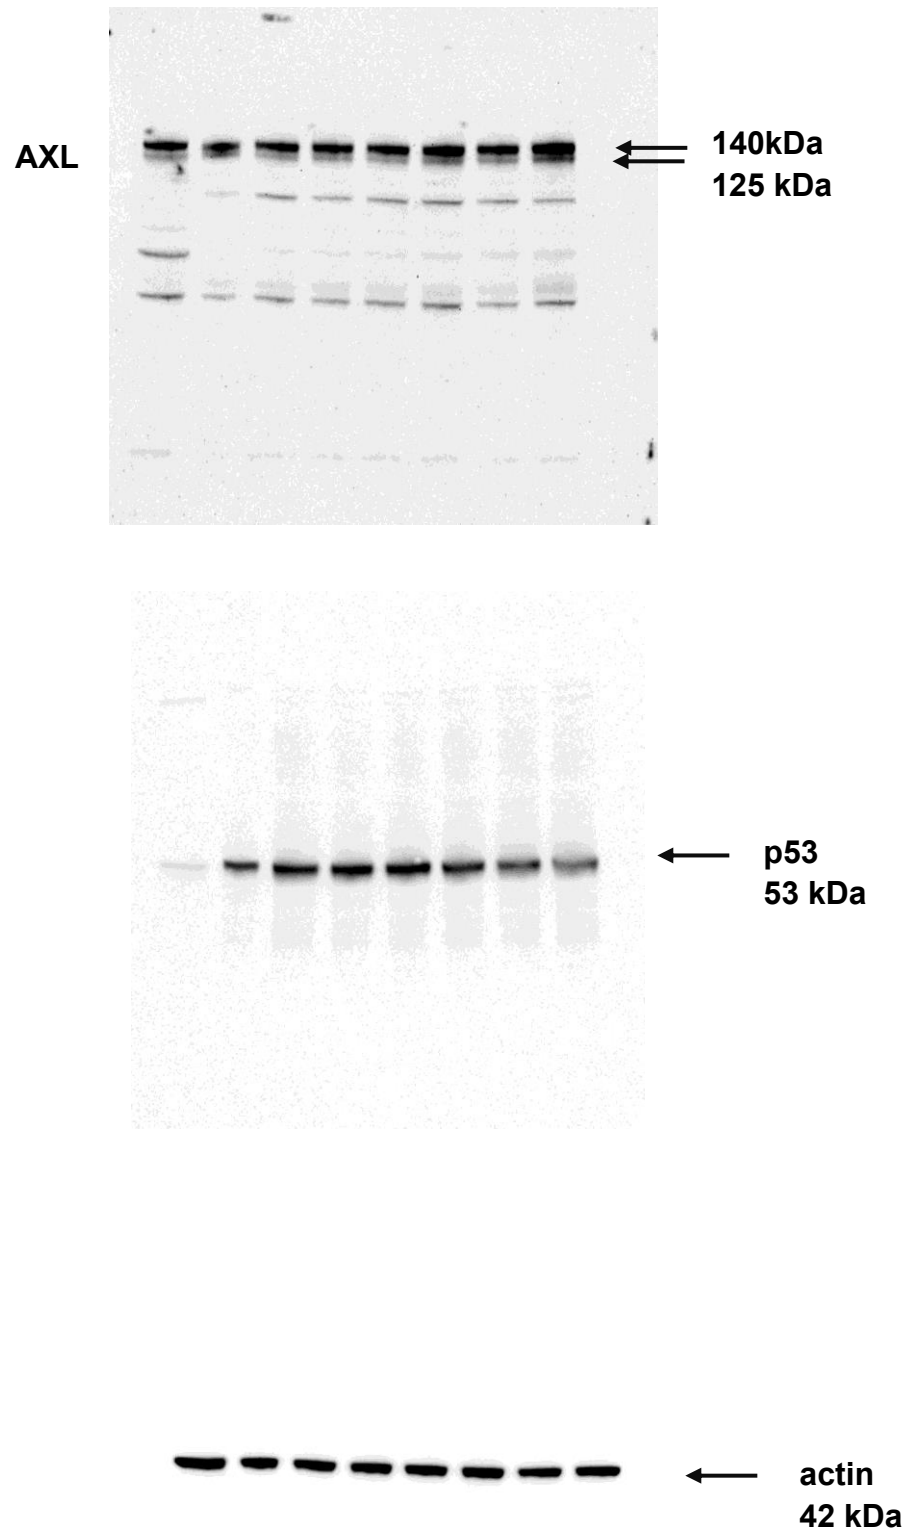

**Figure 2C (AXL transfection in 293T)**

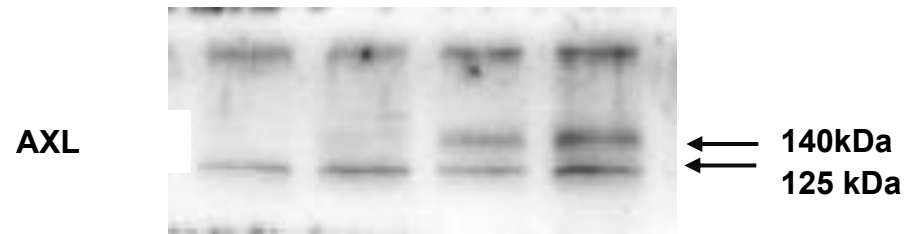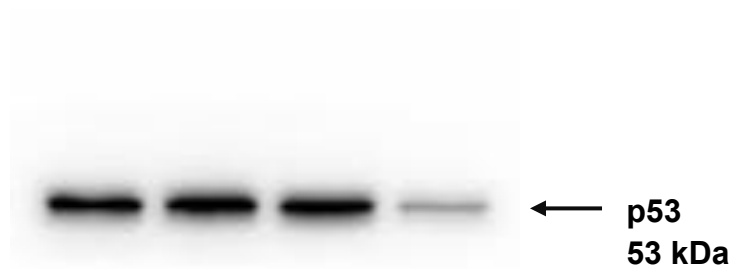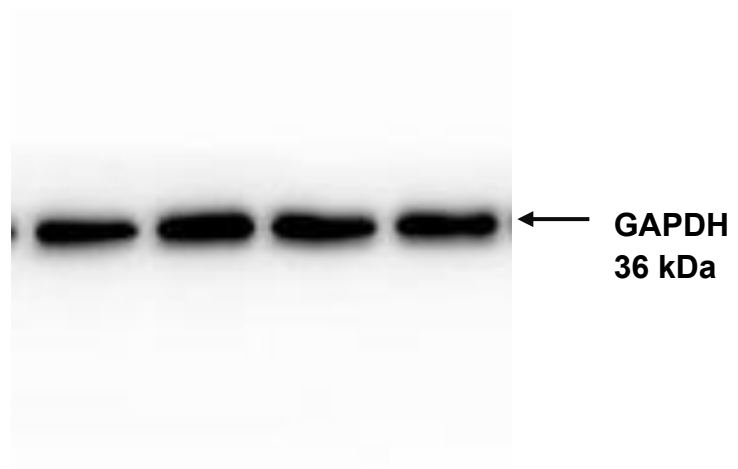

**Figure 3 (order: input, normal IgG IP, AXL IP, and p53 IP)**

**MESO924**

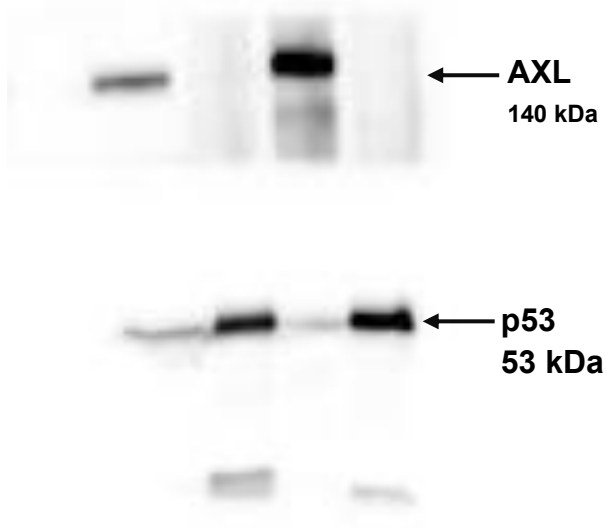

**MESO257**

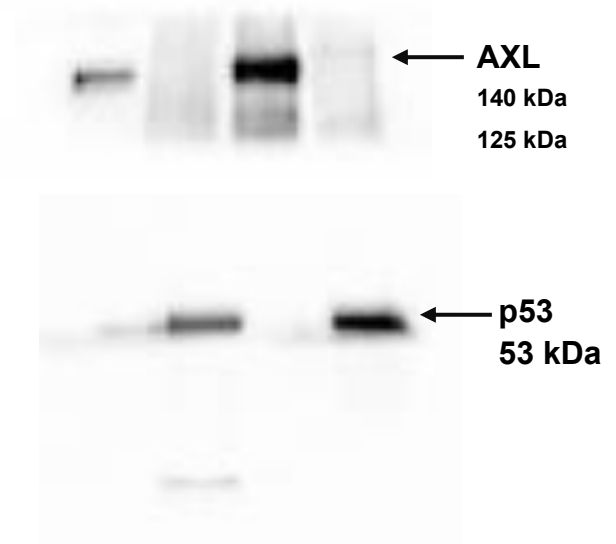

**MESO428**

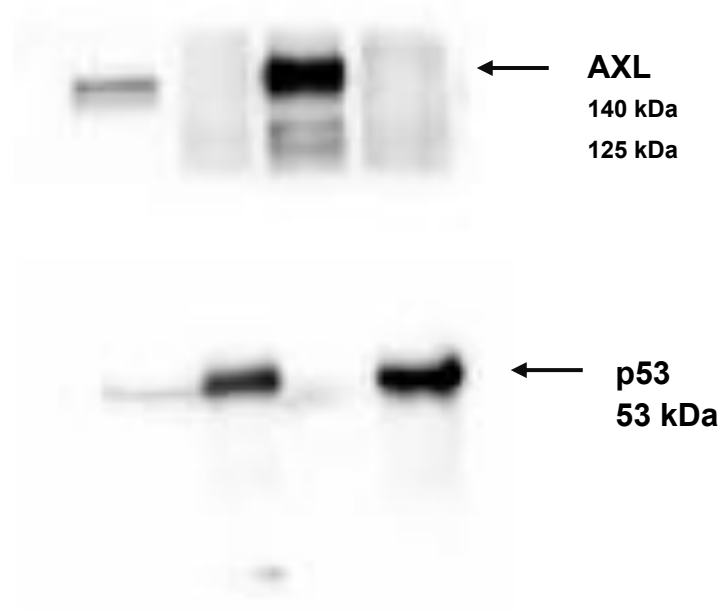

**Figure 4A (Fraction isolation of MESO257 cells: input, membrane, cytoplasm, and nucleus)**

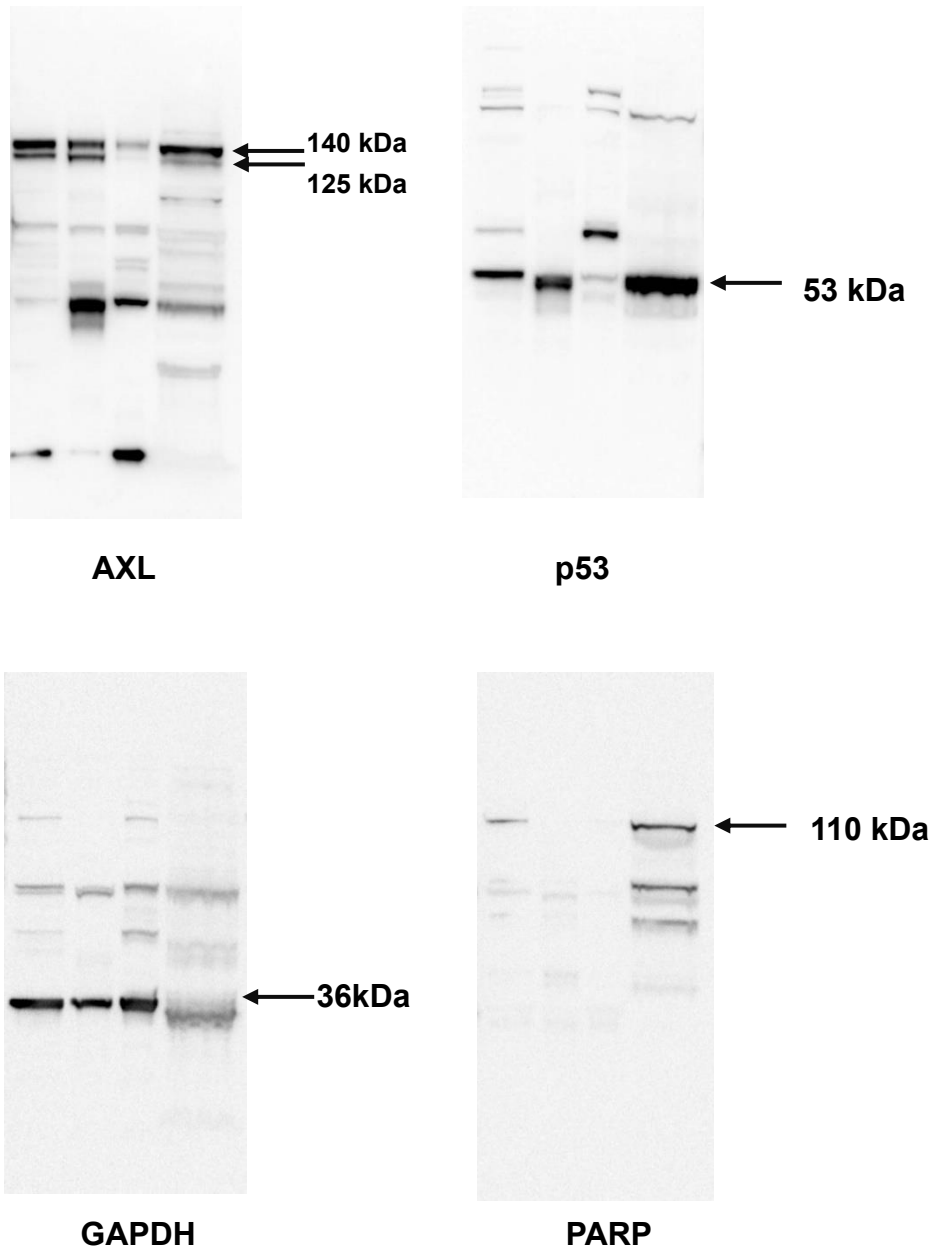

## Supplemental Figure 2

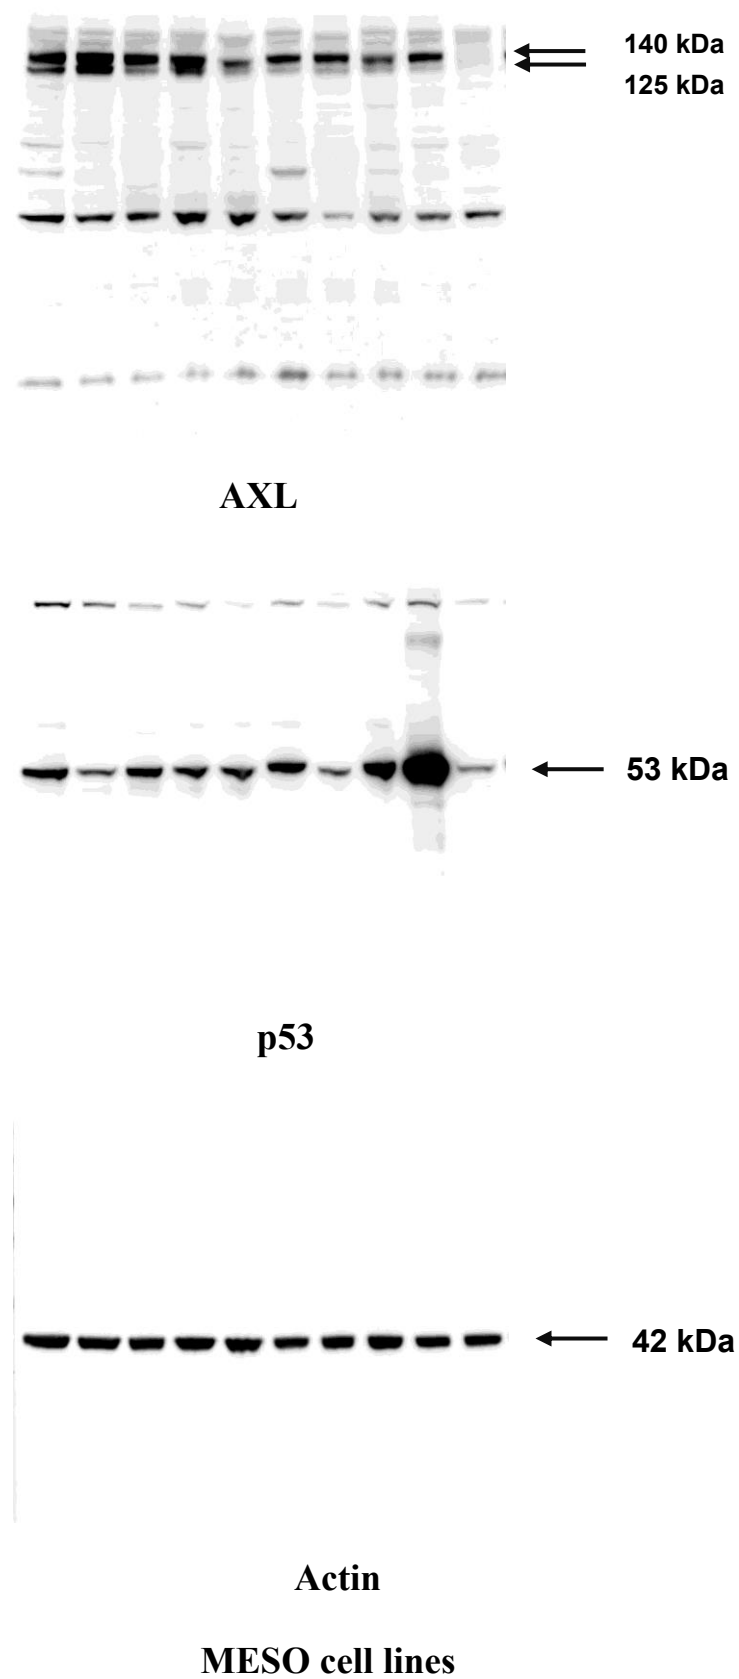

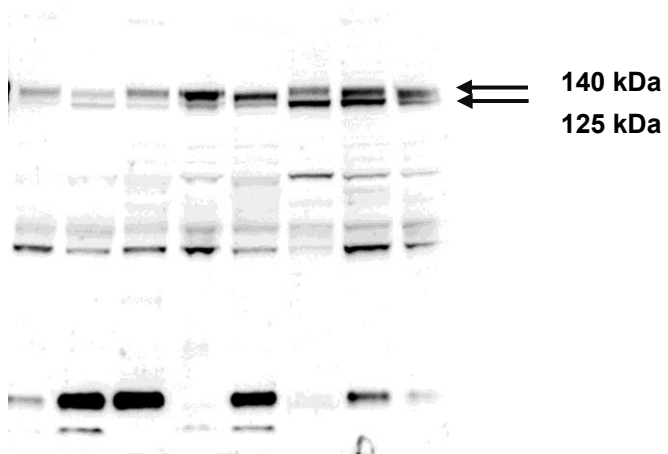

**AXL**

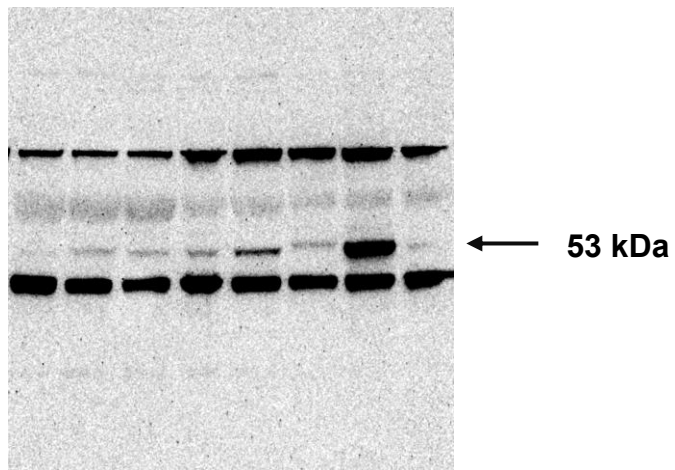

**p53**

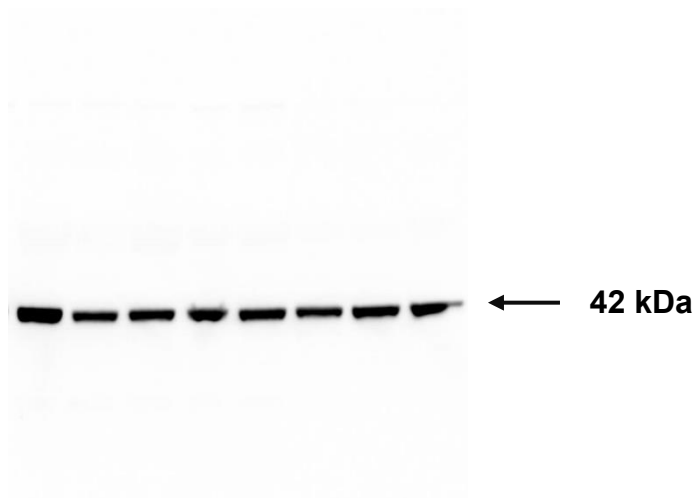

**Actin**

**MESO patient tissues**
